# Supplementary material for: The top-down synthesis of single-layered Cs4CuSb2Cl12 halide perovskite nanocrystals for photoelectrochemical application
Source: Royal Society of Chemistry journal article supplement (doi:10.1039/c9nr00375d), 2019-01-01
Supplement: c9nr00375d1.pdf [file c9nr00375d1.pdf]

## Electronic Supplementary Information

### Top-down synthesis of single layered $\text{Cs}_4\text{CuSb}_2\text{Cl}_{12}$ halide perovskite nanocrystals for photoelectrochemical application

Xu-Dong Wang,<sup>†</sup> Nai-Hua Miao,<sup>†</sup> Jin-Feng Liao, Wen-Qian Li, Yao Xie, Jian Chen, Zhi-Mei Sun, Hong-Yan Chen, and Dai-Bin Kuang<sup>\*a</sup>

<sup>†</sup>Xu-Dong Wang and Nai-Hua Miao contributed equally.

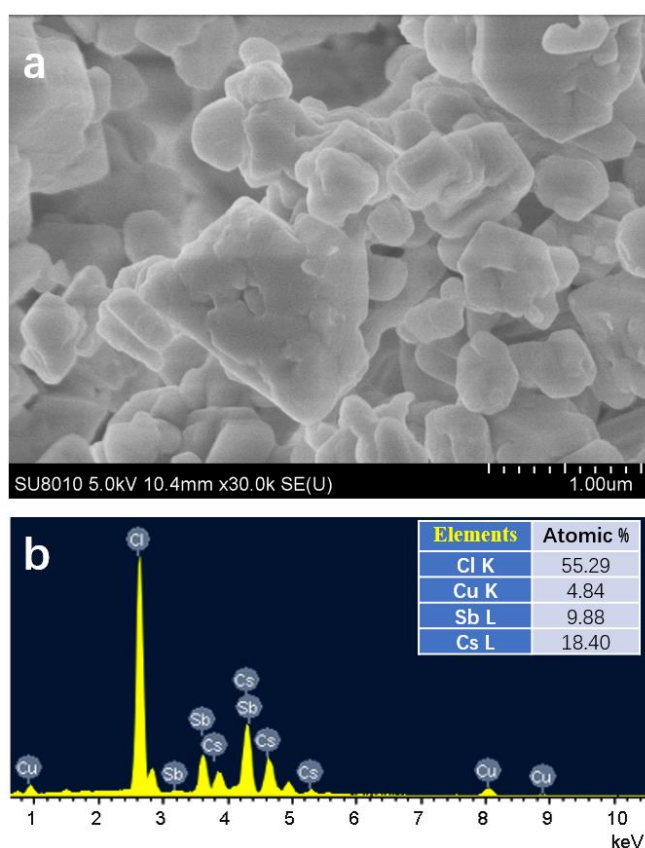

**Fig. S1** SEM image (a) and EDX spectrum (b) of the  $\text{Cs}_4\text{CuSb}_2\text{Cl}_{12}$  microcrystals.

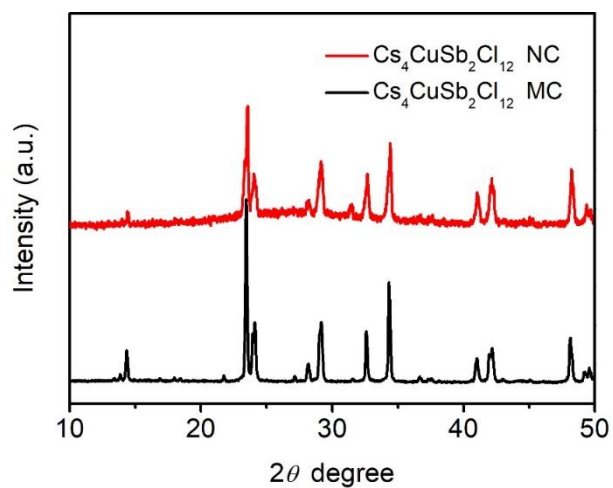

**Fig. S2** XRD patterns of  $\text{Cs}_4\text{CuSb}_2\text{Cl}_{12}$  NCs and microcrystals.

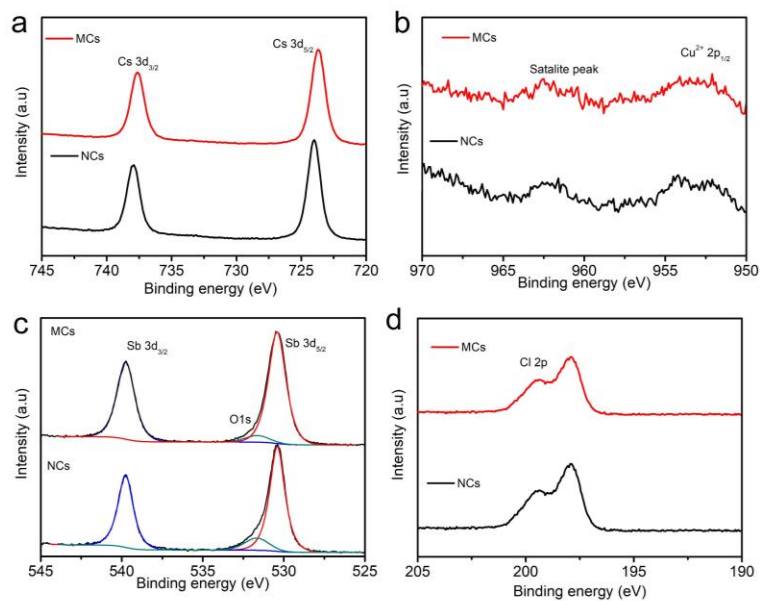

**Fig. S3** XPS spectra of  $\text{Cs}_4\text{CuSb}_2\text{Cl}_{12}$  before and after ultrasonic exfoliation: (a) Cs, (b) Cu, (c) Sb and (d) Cl.

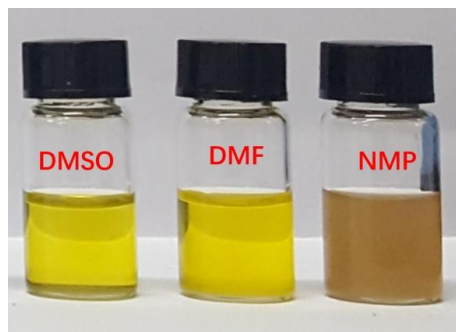

**Fig. S4** Photographs of ultrasonic exfoliation  $\text{Cs}_4\text{CuSb}_2\text{Cl}_{12}$  microcrystal in DMSO, DMF and NMP.

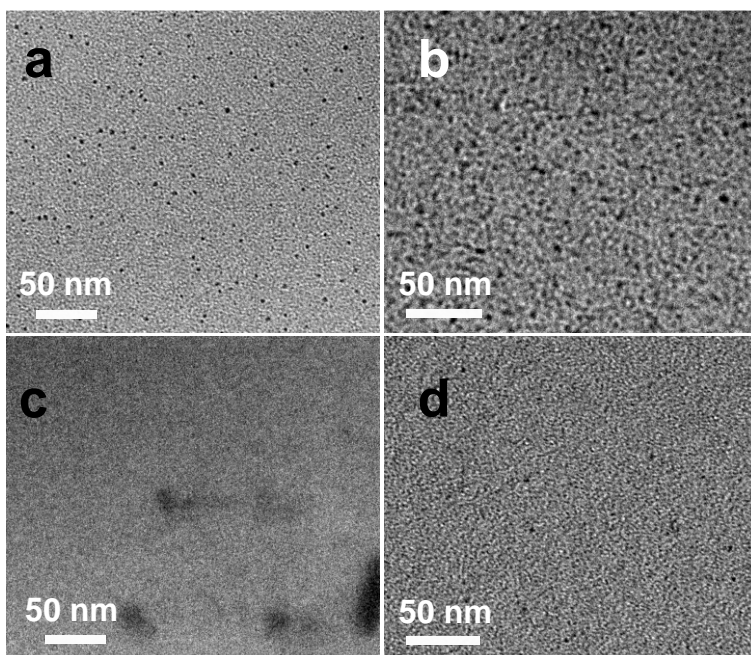

**Fig. S5** TEM images of ultrasonic exfoliation  $\text{Cs}_4\text{CuSb}_2\text{Cl}_{12}$  nanocrystal in different solvents: (a) Toluene, (b)  $\text{CCl}_4$ , (c) Ethyl acetate, (d) Hexane.

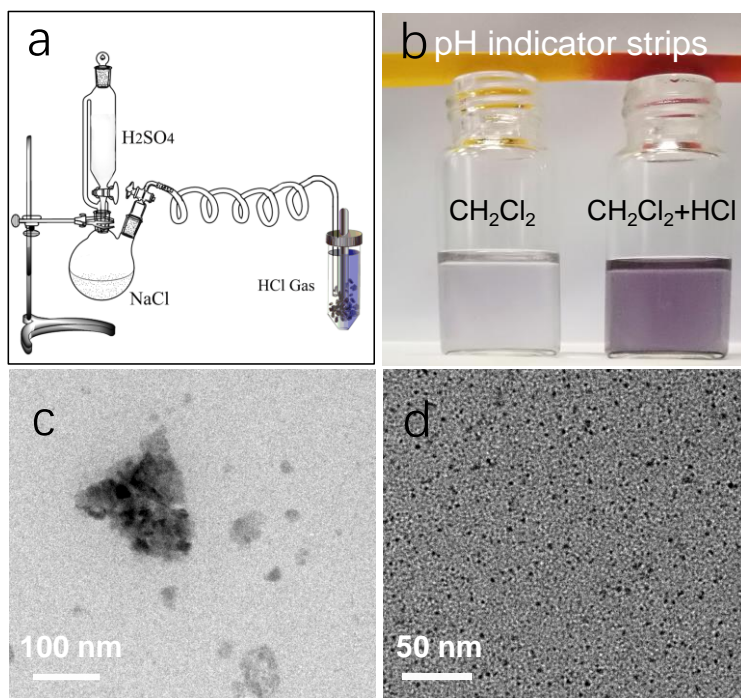

**Fig. S6** (a) Schematic illustration of HCl assisted ultrasonic exfoliation in CH<sub>2</sub>Cl<sub>2</sub>. (b) Photographs of liquid-phase exfoliation with and without HCl. TEM image of Cs<sub>4</sub>CuSb<sub>2</sub>Cl<sub>12</sub> nanocrystals in CH<sub>2</sub>Cl<sub>2</sub> without HCl (c) and with HCl (d) after sonication and centrifugation with 500 rpm.

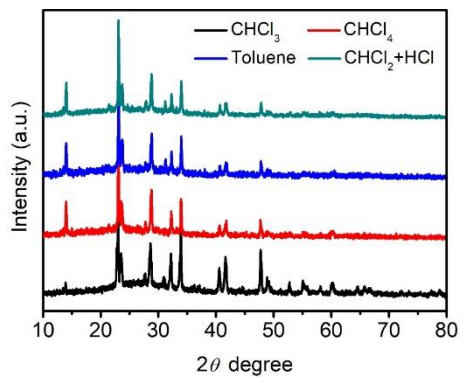

**Fig. S7** XRD patterns of Cs<sub>4</sub>CuSb<sub>2</sub>Cl<sub>12</sub> NCs obtained using different solvents (CHCl<sub>3</sub>, CCl<sub>4</sub>, toluene) and by HCl assisted ultrasonic exfoliation in CH<sub>2</sub>Cl<sub>2</sub>.

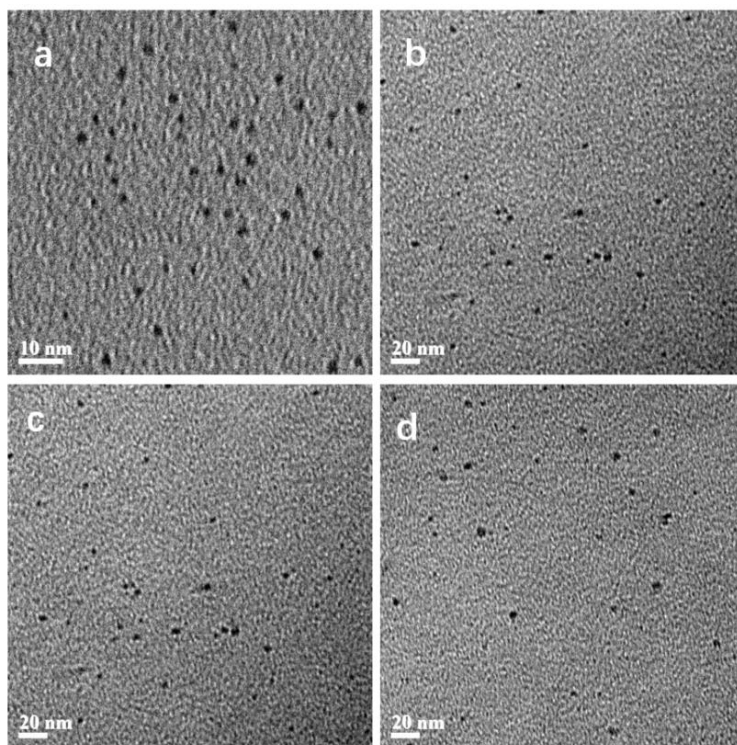

**Fig. S8** TEM images of  $\text{Cs}_4\text{CuSb}_2\text{Cl}_{12}$  nanocrystals ultrasonic exfoliation in  $\text{CHCl}_3$  after centrifugation under different speeds: (a) 500 rpm, (b) 1000 rpm, (c) 2000 rpm, (d) 4000 rpm.

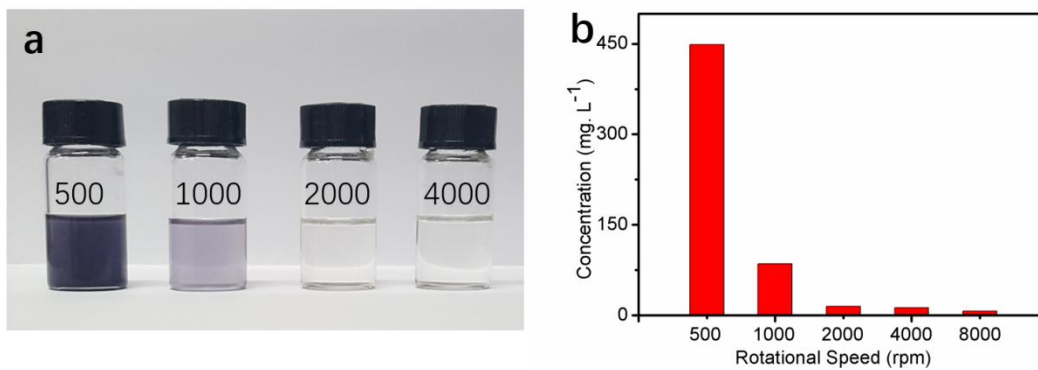

**Fig. S9** Photograph (a) and concentration (b) of  $\text{Cs}_4\text{CuSb}_2\text{Cl}_{12}$  nanocrystals in  $\text{CHCl}_3$  prepared after ultrasonication and centrifugation with different speeds.



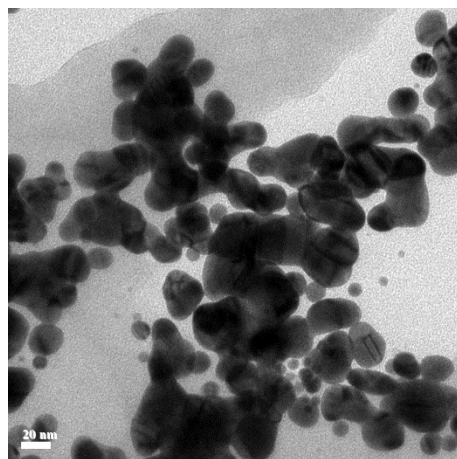

**Fig. S10**  $\text{Cs}_4\text{CuSb}_2\text{Cl}_{12}$  NCs prepared by ultrasonication in  $\text{CHCl}_3$  without OA.

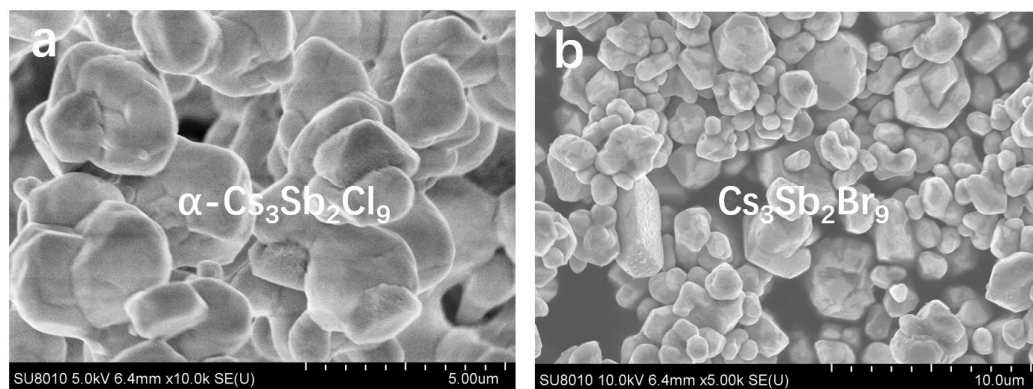

**Fig. S11** XRD patterns of the  $\text{Cs}_3\text{Sb}_2\text{Cl}_9$  (a) microcrystals and  $\text{Cs}_3\text{Sb}_2\text{Br}_9$  (b) microcrystals.

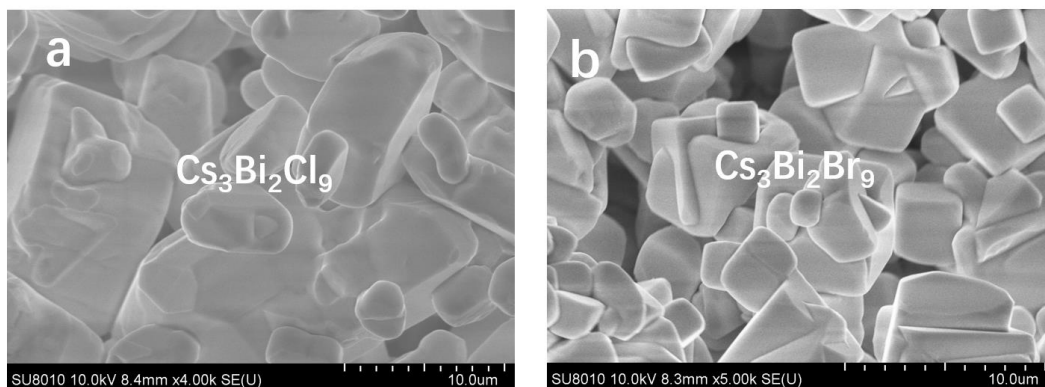

**Fig. S12** XRD patterns of the  $\text{Cs}_3\text{Bi}_2\text{Cl}_9$  (a) microcrystals and  $\text{Cs}_3\text{Bi}_2\text{Br}_9$  (b) microcrystals.

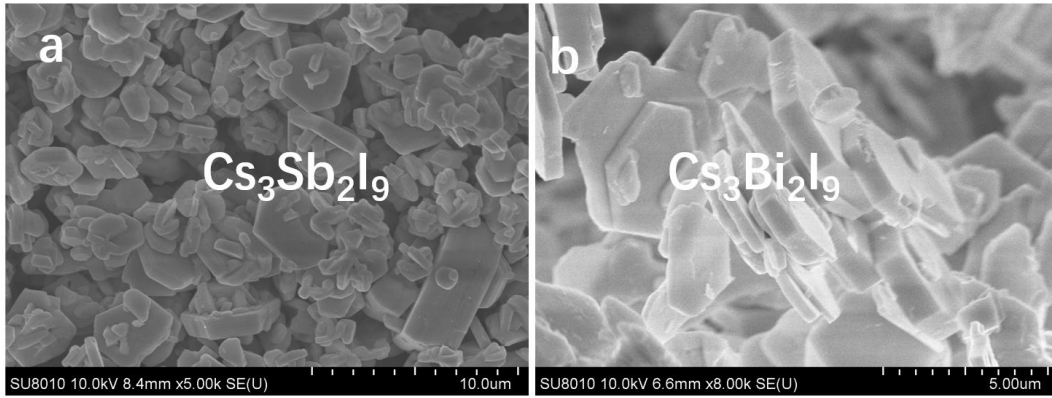

**Fig. S13** XRD patterns of the  $\text{Cs}_3\text{Sb}_2\text{I}_9$  (a) microcrystals and  $\text{Cs}_3\text{Bi}_2\text{I}_9$  (b) microcrystals.

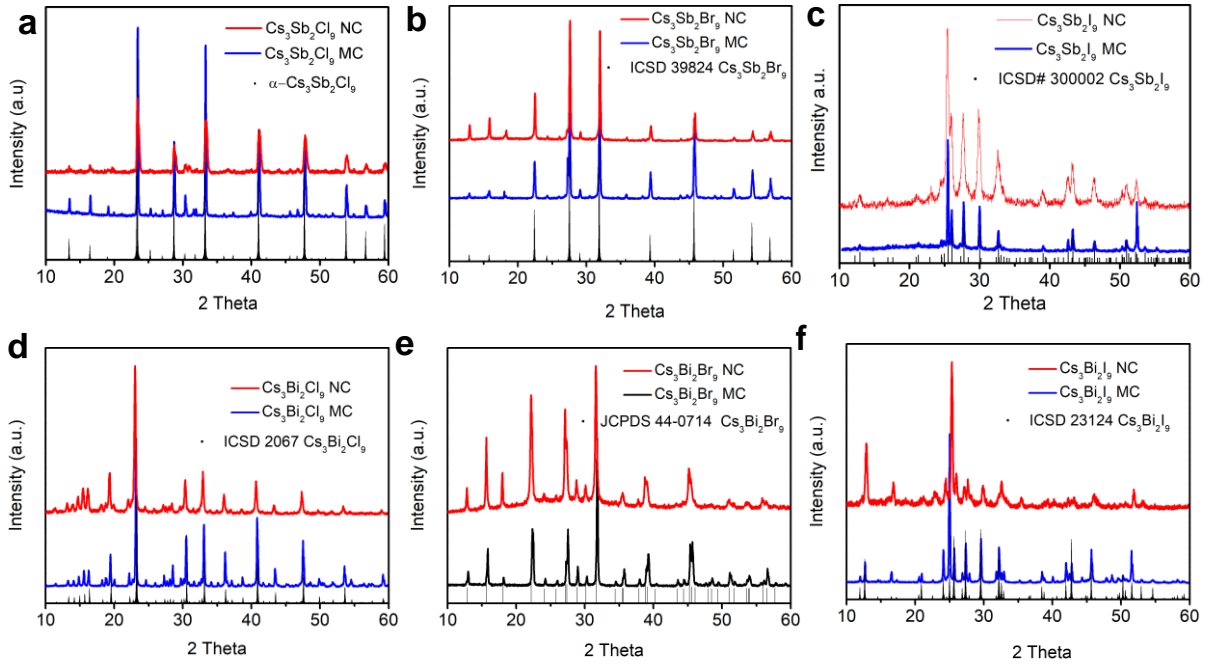

**Fig. S14** The XRD patterns of  $\text{Cs}_3\text{Sb}_2\text{X}_9$  and  $\text{Cs}_3\text{Bi}_2\text{X}_9$  before and after exfoliation. (The XRD patterns of the as-prepared  $\text{Cs}_3\text{Sb}_2\text{Cl}_9$  matches with the  $\alpha\text{-Cs}_3\text{Sb}_2\text{Cl}_9$  phase. Other peaks are assigned to a secondary phase (No. ICSD 2066).)

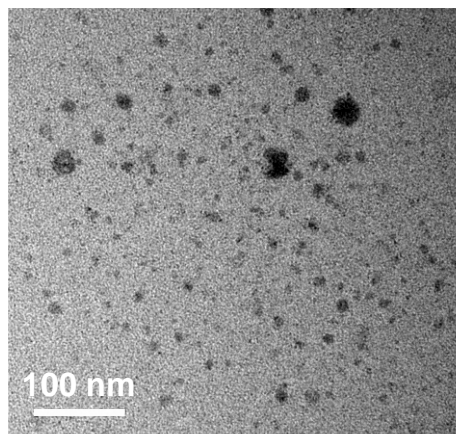

**Fig. S15**  $\text{Cs}_3\text{Sb}_2\text{Cl}_9$  NCs in  $\text{CHCl}_3$  after sonication 60 min and centrifugation at 500 rpm.

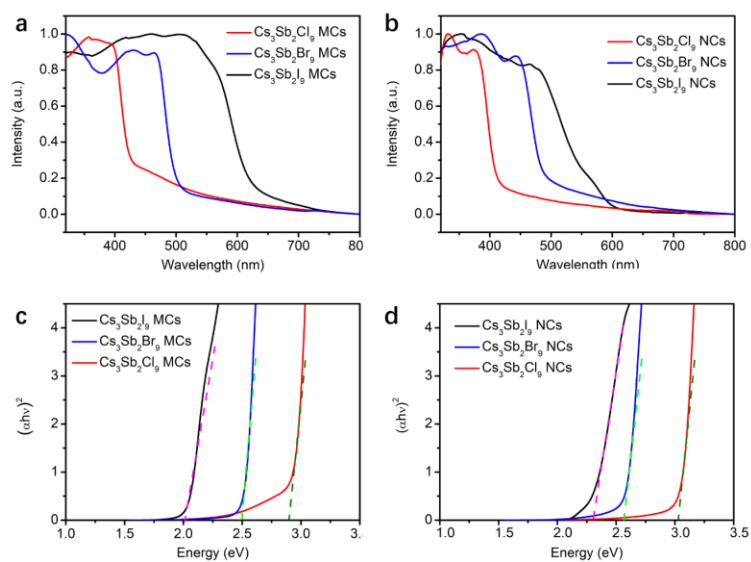

**Fig. S16** UV-Vis spectra of  $\text{Cs}_3\text{Sb}_2\text{X}_9$  microcrystals (a) and NCs (b); (c, d) corresponding Tauc plots.



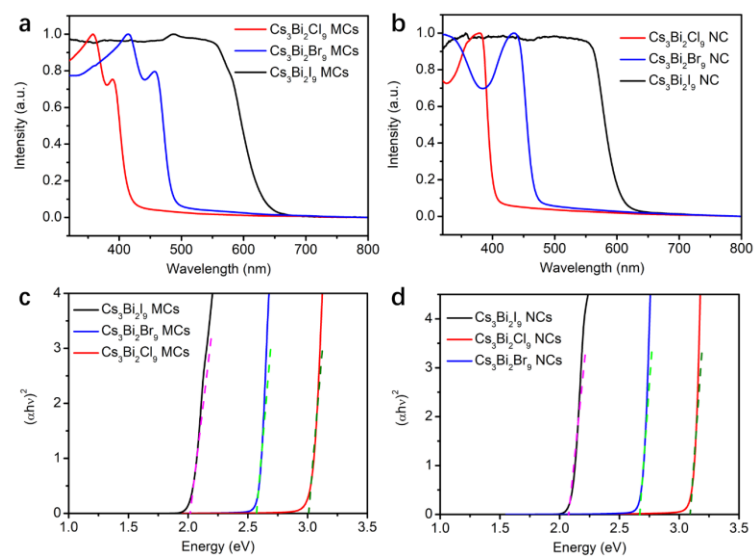

**Fig. S17** UV-Vis spectra of  $\text{Cs}_3\text{Bi}_2\text{X}_9$  microcrystals (a) and NCs (b); (c, d) corresponding Tauc plots.

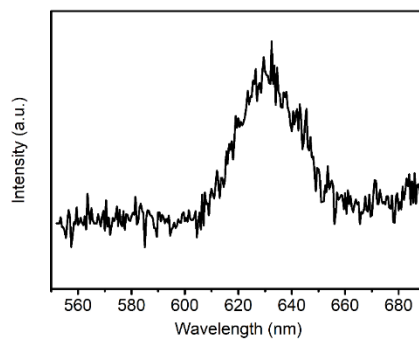

**Fig. S18** Photoluminescence spectra of the  $\text{Cs}_4\text{CuSb}_2\text{Cl}_{12}$  NCs.

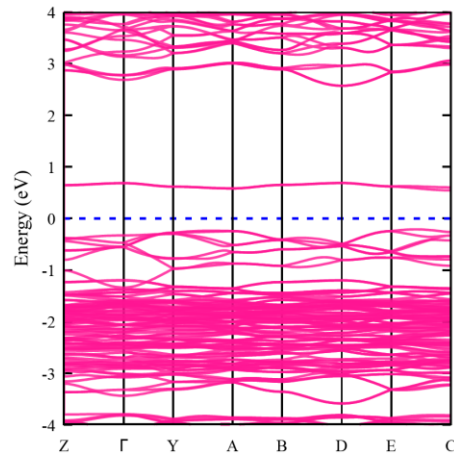

**Fig. S19** Electronic band structures of the bulk  $\text{Cs}_4\text{CuSb}_2\text{Cl}_{12}$ .

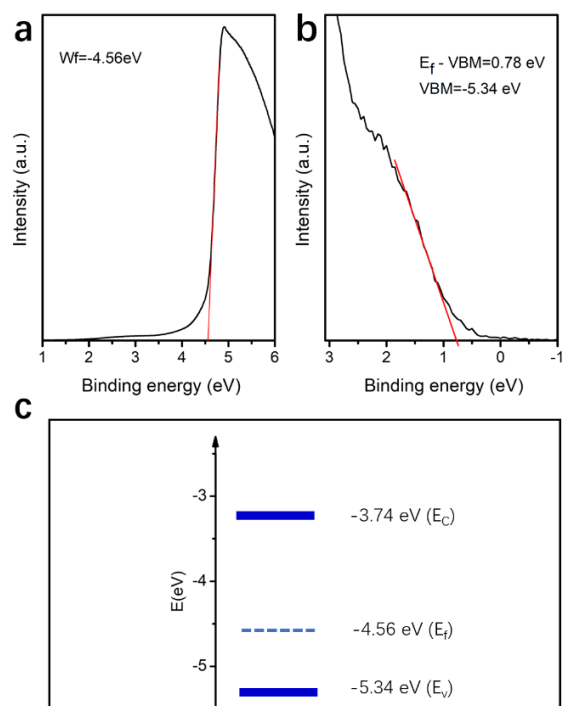

**Fig. S20** (a, b) UPS characteristics of  $\text{Cs}_4\text{CuSb}_2\text{Cl}_{12}$  NCs film, (c) Schematic diagram of the band structure for  $\text{Cs}_4\text{CuSb}_2\text{Cl}_{12}$  NCs.

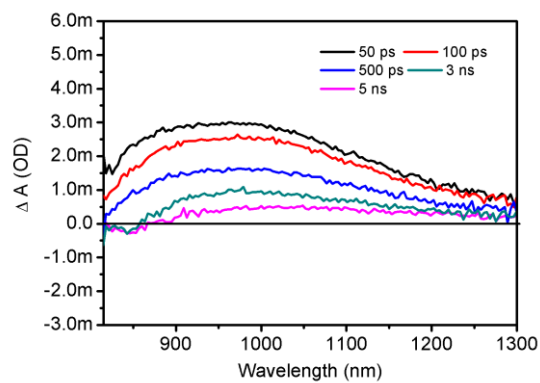

**Fig. S21** TA spectra at infrared region indicated delay time from 50 ps to 5 ns.

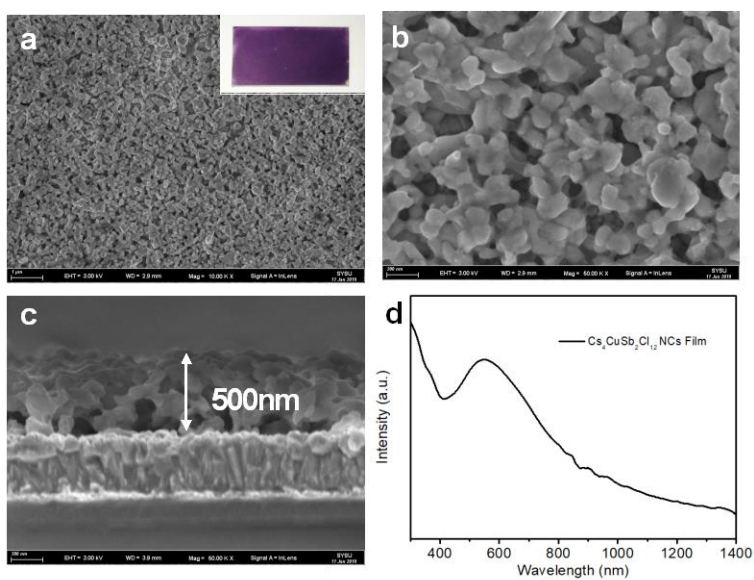

**Fig. S22** SEM images (a-c) and inset, a photograph of  $\text{Cs}_4\text{CuSb}_2\text{Cl}_{12}$  NCs deposited on the FTO, (d) UV-Vis-NIR spectra of the of  $\text{Cs}_4\text{CuSb}_2\text{Cl}_{12}$  film.

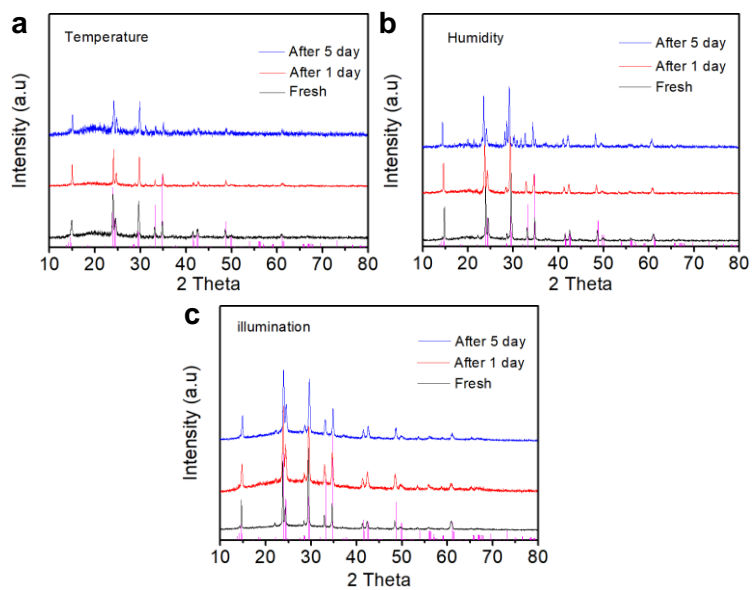

**Fig. S23** Stability tests of Cs<sub>4</sub>CuSb<sub>2</sub>Cl<sub>12</sub> NCs: (a) heating at 80 °C (b) exposing to humidity of 65%, and (c) illumination at 100 mWcm<sup>-2</sup>.

**Table S1.** Experimental and calculated structural parameters and bandgap of bulk  $\text{Cs}_3\text{Sb}_2\text{Cl}_9$ ,  $\text{Cs}_3\text{Sb}_2\text{Br}_9$ ,  $\text{Cs}_3\text{Sb}_2\text{I}_9$  and  $\text{Cs}_4\text{CuSb}_2\text{Cl}_{12}$ .

|                  |              | $\text{Cs}_3\text{Sb}_2\text{Cl}_9$ |       | $\text{Cs}_3\text{Sb}_2\text{Br}_9$ |       | $\text{Cs}_3\text{Sb}_2\text{I}_9$ |        | $\text{Cs}_4\text{CuSb}_2\text{Cl}_{12}$ |        |
|------------------|--------------|-------------------------------------|-------|-------------------------------------|-------|------------------------------------|--------|------------------------------------------|--------|
|                  |              | GGA                                 | Expt. | GGA                                 | Expt. | GGA                                | Expt.  | GGA                                      | Expt.  |
|                  |              | PBE                                 |       | PBE                                 |       | PBE                                |        | PBE                                      |        |
|                  | $a$ (Å)      | 7.645                               | 7.610 | 7.976                               | 7.930 | 8.458                              | 8.348  | 13.175                                   | 13.026 |
|                  | $b$ (Å)      | 7.645                               | 7.610 | 7.976                               | 7.930 | 8.458                              | 8.348  | 7.349                                    | 7.327  |
|                  | $c$ (Å)      | 9.370                               | 9.320 | 9.820                               | 9.716 | 21.268                             | 20.928 | 13.161                                   | 13.006 |
|                  | $\alpha$ (°) | 90.00                               | 90.00 | 90.00                               | 90.00 | 90.00                              | 90.00  | 90.00                                    | 90.00  |
|                  | $\beta$ (°)  | 90.00                               | 90.00 | 90.00                               | 90.00 | 90.00                              | 90.00  | 112.36                                   | 111.98 |
| PBE              | $E_g$ (eV)   | 2.42                                | 2.91  | 1.90                                | 2.51  | 1.73                               | 2.02   | 0                                        | 1.02   |
| HSE06<br>(PBE+U) | $E_g$ (eV)   | 3.03                                | -     | 2.52                                | -     | 2.30                               | -      | 0.48<br>(0.80)                           | -      |

**Table S2.** Experimental and calculated structural parameters and bandgap of monolayer  $\text{Cs}_3\text{Sb}_2\text{Cl}_9$ ,  $\text{Cs}_3\text{Sb}_2\text{Br}_9$ ,  $\text{Cs}_3\text{Sb}_2\text{I}_9$  and  $\text{Cs}_4\text{CuSb}_2\text{Cl}_{12}$ .

|              |            | $\text{Cs}_3\text{Sb}_2\text{Cl}_9$ | $\text{Cs}_3\text{Sb}_2\text{Br}_9$ | $\text{Cs}_3\text{Sb}_2\text{I}_9$ | $\text{Cs}_4\text{CuSb}_2\text{Cl}_{12}$ |
|--------------|------------|-------------------------------------|-------------------------------------|------------------------------------|------------------------------------------|
|              | $a$ (Å)    | 7.594                               | 7.935                               | 8.444                              | 13.167                                   |
|              | $b$ (Å)    | 7.594                               | 7.935                               | 8.444                              | 7.315                                    |
| PBE          | $E_g$ (eV) | 2.72                                | 2.27                                | 2.08                               | 2.01                                     |
| HSE06(PBE+U) | $E_g$ (eV) | 3.47                                | 2.93                                | 2.61                               | 0.68(0.91)                               |
| Expt.        | $E_g$ (eV) | 3.05                                | 2.58                                | 2.30                               | 1.6                                      |



Please note that: Usually, the HSE06 functional could well reproduce the experimental band gap of most compounds as shown in Table S1, except for the gap of  $\text{Cs}_4\text{CuSb}_2\text{Cl}_{12}$  which is greatly underestimated. While the GGA-PBE underestimates all the gaps or even gives wrong value as often observed in the Cu-based compounds.<sup>[1-3]</sup> Therefore, in order to better reproduce the experimental electronic band gap of the bulk and single-layer  $\text{Cs}_4\text{CuSb}_2\text{Cl}_{12}$ , the GGA+U approach, which shows better agreement with our experiments, has been adopted for the electronic band structure and density of states.

## References

- 1 M. Heinemann, B. Eifert, C. Heiliger, *Phys. Rev. B: Condens. Matter Mater. Phys.*, 2013, **87**, 115111.
- 2 R. Laskowski, P. Blaha, K. Schwarz, *Phys. Rev. B: Condens. Matter Mater. Phys.*, 2003, **67**, 075102.
- 3 M. Nolan, S. D. Elliott, *Phys. Chem. Chem. Phys.*, 2006, **8**, 5350.
